# Supplementary material for: A Perilipin Gene from Clonostachys rosea f. Catenulata HL-1-1 Is Related to Sclerotial Parasitism
Source: MDPI journal article supplement (doi:10.3390/ijms16035347), 2015-03-09
Supplement: s1 [file s1]

## Supplementary Information

**Table S1.** Gene Ontology functional annotation of differently expressed genes.

| Gene | Biological Process P                         | Molecular Function F                                            | Cellular Component                                                     |
|------|----------------------------------------------|-----------------------------------------------------------------|------------------------------------------------------------------------|
| 2-25 | Phosphate ion transport                      | Inorganic phosphate transmembrane transporter activity          | Membrane                                                               |
| 2-26 | Cellular carbohydrate metabolic process      | Transferase activity;<br>Transferring acyl groups               | -                                                                      |
| 2-49 | -                                            | Oxidoreductase activity; Binding                                | -                                                                      |
| 2-90 | Oxidation-reduction process                  | Oxidoreductase activity;<br>Iron ion binding; Heme binding      | -                                                                      |
| 3-4  | -                                            | Phosphopantetheine binding                                      | -                                                                      |
| 4-33 | Aromatic amino acid family metabolic process | 4-hydroxyphenylpyruvate dioxygenase activity                    | -                                                                      |
| 4-37 | -                                            | Protein binding                                                 | -                                                                      |
| 4-47 | Transmembrane transport                      | Transporter activity                                            | Mitochondrial inner membrane;<br>Integral to membrane                  |
| 7-13 | -                                            | -                                                               | Integral to membrane                                                   |
| 7-32 | -                                            | Protein binding                                                 | -                                                                      |
| 7-73 | Oxidation-reduction process                  | Oxidoreductase activity                                         | -                                                                      |
| 8-7  | ATP synthesis coupled proton transport       | Hydrogen ion transmembrane transporter activity                 | Mitochondrial proton-transporting ATP synthase complex-coupling factor |
| 8-20 | Carbohydrate metabolic process               | Hydrolase activity;<br>Hydrolyzing <i>O</i> -glycosyl compounds | -                                                                      |
| 8-24 | Chitin biosynthetic process                  | Chitin synthase activity                                        | -                                                                      |
| 8-70 | ER to Golgi vesicle-mediated transport       | -                                                               | Intracellular                                                          |
| 8-76 | Protein folding;<br>Replicative cell aging   | -                                                               | Mitochondrial inner membrane                                           |
| 8-89 | Oxidation-reduction process                  | Oxidoreductase activity;<br>Molybdenum ion binding              | -                                                                      |
| 9-25 | Translation                                  | Structural constituent of ribosome                              | Ribosome                                                               |

“-” means no annotation in this term. Genes without annotation in all three terms were not listed.

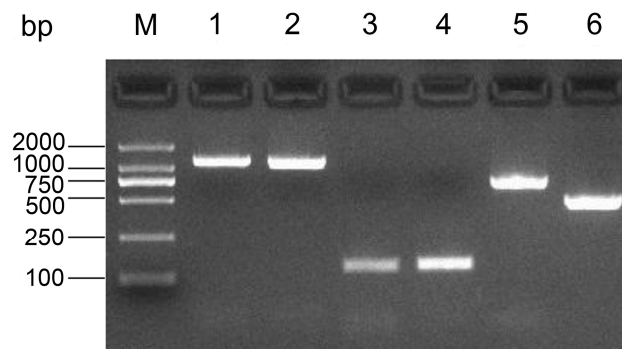

**Figure S1.** Agarose gel electrophoresis. M: Marker; Lane 1: Complete DNA of *Per3*; Lane 2: Full-length cDNA of *Per3*; Lane 3: PCR amplification of  $\beta$ -tubulin using specific primers  $\beta$ -tubulin F and  $\beta$ -tubulin R; Lane 4: PCR amplification of *Per3* using primers *Per3* F and *Per3* R; Lane 5: 5'RACE of *Per3*; Lane 6: 3'RACE of *Per3*.
